# Supplementary material
Source: PubMed Central journal article supplement (PMC7197389)
Supplement: NIHMS1568845-supplement-1.pdf [file NIHMS1568845-supplement-1.pdf]

**Table S1** – List of general autophagy genes that are targeted in the pilot autophagy gene screen. Related to Fig 1 and Supplemental Fig 1.

| Gene Name | Ensembl No.     |
|-----------|-----------------|
| ULK1      | ENSG00000177169 |
| ULK2      | ENSG00000083290 |
| ATG13     | ENSG00000175224 |
| FIP200    | ENSG00000023287 |
| ATG101    | ENSG00000123395 |
| ATG9A     | ENSG00000198925 |
| ATG9B     | ENSG00000181652 |
| WIPI1     | ENSG00000070540 |
| WIPI2     | ENSG00000157954 |
| PIK3R4    | ENSG00000196455 |
| VPS34     | ENSG00000078142 |
| BECN      | ENSG00000126581 |
| ATG14     | ENSG00000126775 |
| UVRAG     | ENSG00000198382 |
| ATG3      | ENSG00000144848 |
| ATG4A     | ENSG00000101844 |
| ATG4B     | ENSG00000168397 |
| ATG4C     | ENSG00000125703 |
| ATG4D     | ENSG00000130734 |
| ATG5      | ENSG00000057663 |
| ATG7      | ENSG00000197548 |
| LC3A      | ENSG00000101460 |
| LC3B      | ENSG00000140941 |
| LC3B2     | ENSG00000258102 |
| GABARAP   | ENSG00000170296 |
| GABARAPL1 | ENSG00000139112 |
| GABARAPL2 | ENSG00000034713 |
| ATG10     | ENSG00000152348 |
| ATG12     | ENSG00000145782 |
| ATG16L1   | ENSG00000085978 |
| ATG16L2   | ENSG00000168010 |

**Table S2** – High confidence hits with Enhanced or Inhibited score of P<0.01. Related to Fig 1 and Supplemental Fig S1.

| gene      | Localization | Enhanced(P-value) | Enhanced(log2 Fold change) | Inhibit (P-value) | Inhibit (log2 Fold change) | Enh/Inh (P-value) | Enh/Inh (Fold change) |
|-----------|--------------|-------------------|----------------------------|-------------------|----------------------------|-------------------|-----------------------|
| VPS16     | lyso         | 0.077             | -4.578                     | 0.002             | 1.338                      | 0.001             | -5.368                |
| PSMA5     | cyto         | 0.263             | -1.152                     | 0.042             | 2.597                      | 0.003             | -4.701                |
| PREB      | ER/lyso      | 0.045             | -1.513                     | 0.023             | 2.902                      | 0.006             | -4.177                |
| ATP5O     | mito         | 0.156             | -3.428                     | 0.007             | 0.637                      | 0.003             | -3.862                |
| CORO2A    | cyto         | 0.238             | -1.363                     | 0.019             | 1.567                      | 0.006             | -3.796                |
| LRRC34    | nuc          | 0.473             | -0.740                     | 0.079             | 2.325                      | 0.001             | -3.783                |
| PRPF4     | nuc          | 0.018             | -3.305                     | 0.086             | 1.501                      | 0.004             | -3.662                |
| RNF113A   | nuc          | 0.018             | -3.572                     | 0.181             | 1.242                      | 0.004             | -3.607                |
| RPL23     | cyto         | 0.756             | -2.475                     | 0.328             | 3.792                      | 0.000             | -3.602                |
| NDUFB2    | mito         | 0.452             | -2.580                     | 0.003             | 1.051                      | 0.001             | -3.504                |
| MMP24     | golgi/extra  | 0.033             | -3.140                     | 0.096             | 0.358                      | 0.003             | -3.433                |
| PSMB5     | cyto         | 0.003             | -2.790                     | 0.140             | 0.381                      | 0.003             | -3.176                |
| HSD17B10  | mito         | 0.000             | -2.930                     | 0.039             | 0.492                      | 0.000             | -3.150                |
| PAPSS1    | cyto         | 0.066             | -2.277                     | 0.242             | 0.895                      | 0.008             | -3.114                |
| PICK1     | mito         | 0.030             | -2.722                     | 0.143             | 0.313                      | 0.006             | -3.041                |
| TARS2     | mito         | 0.035             | -2.573                     | 0.026             | 0.706                      | 0.005             | -2.983                |
| DR1       | nuc          | 0.019             | -2.757                     | 0.134             | 0.374                      | 0.003             | -2.967                |
| DLD       | mito         | 0.044             | -0.800                     | 0.046             | 1.446                      | 0.004             | -2.956                |
| SERINC2   | extracell    | 0.316             | -1.540                     | 0.065             | 0.553                      | 0.009             | -2.944                |
| ATF5      | cyto         | 0.183             | -0.806                     | 0.392             | 2.432                      | 0.004             | -2.895                |
| RPS6KB2   | cyto/nuc     | 0.099             | -2.248                     | 0.231             | 1.759                      | 0.001             | -2.780                |
| MMAA      | mito         | 0.004             | -2.450                     | 0.290             | 0.291                      | 0.004             | -2.736                |
| MRPL24    | mito         | 0.009             | -2.653                     | 0.350             | 0.206                      | 0.002             | -2.701                |
| CYB5B     | mito         | 0.017             | -2.444                     | 0.128             | 0.197                      | 0.002             | -2.647                |
| NDUFS8    | mito         | 0.025             | -2.025                     | 0.119             | 0.940                      | 0.001             | -2.514                |
| MAP4      | cyto         | 0.001             | -1.838                     | 0.452             | 0.647                      | 0.001             | -2.489                |
| SGOL1     | cyto/nuc     | 0.028             | -2.509                     | 0.598             | 0.969                      | 0.007             | -2.474                |
| NDUFB4    | mito         | 0.002             | -2.233                     | 0.057             | 0.379                      | 0.000             | -2.449                |
| CCAR1     | nuc          | 0.071             | -2.976                     | 0.230             | 0.047                      | 0.003             | -2.418                |
| DDX52     | nuc          | 0.127             | -1.969                     | 0.215             | 0.228                      | 0.008             | -2.408                |
| SLC7A9    | PM           | 0.019             | -2.104                     | 0.225             | 0.390                      | 0.010             | -2.404                |
| PLD4      | ER           | 0.125             | -2.144                     | 0.073             | 0.601                      | 0.003             | -2.238                |
| MGLL      | ER           | 0.032             | -2.244                     | 0.252             | 0.197                      | 0.002             | -2.235                |
| VAR52     | mito         | 0.002             | -1.740                     | 0.003             | 0.660                      | 0.000             | -2.184                |
| LOC441155 | nuc          | 0.059             | -1.866                     | 0.984             | 0.169                      | 0.004             | -2.163                |
| PIK3C3    | cyto/lyso    | 0.115             | -1.250                     | 0.046             | 1.094                      | 0.002             | -2.135                |
| ABHD8     | extracell    | 0.018             | -2.204                     | 0.988             | 0.056                      | 0.008             | -2.129                |
| DFFA      | cyto/nuc     | 0.058             | -2.106                     | 0.221             | 0.215                      | 0.003             | -2.122                |
| ADAM18    | PM           | 0.070             | -2.343                     | 0.969             | 0.045                      | 0.002             | -2.113                |
| RACGAP1   | cyto         | 0.009             | -1.760                     | 0.750             | 1.216                      | 0.003             | -2.110                |
| OXA1L     | mito         | 0.008             | -1.531                     | 0.008             | 0.772                      | 0.001             | -2.107                |
| GNAS      | cyto/nuc     | 0.037             | -1.752                     | 0.179             | 0.296                      | 0.005             | -2.102                |
| FGFBP3    | extracell    | 0.096             | -1.818                     | 0.047             | 0.466                      | 0.006             | -2.078                |
| NUDCD1    | cyto         | 0.021             | -0.913                     | 0.276             | 0.589                      | 0.002             | -2.031                |
| RBM28     | nuc          | 0.011             | -1.583                     | 0.210             | 0.360                      | 0.009             | -2.025                |
| MTNR1A    | PM           | 0.146             | -1.006                     | 0.057             | 1.024                      | 0.007             | -1.962                |
| SUPV3L1   | mito         | 0.120             | -0.848                     | 0.043             | 0.937                      | 0.007             | -1.929                |
| GDI1      | cyto         | 0.071             | -1.422                     | 0.117             | 0.202                      | 0.007             | -1.920                |
| NR2C1     | nuc          | 0.030             | -1.907                     | 0.801             | 0.028                      | 0.005             | -1.903                |
| FMOD      | lyso         | 0.329             | -0.293                     | 0.119             | 1.756                      | 0.008             | -1.870                |
| NDUFA8    | mito         | 0.003             | -1.696                     | 0.314             | 0.422                      | 0.000             | -1.853                |
| RPL10L    | cyto         | 0.265             | -1.688                     | 0.508             | 0.285                      | 0.006             | -1.844                |
| LEO1      | nuc          | 0.102             | -1.726                     | 0.184             | 0.414                      | 0.005             | -1.801                |
| HLTF      | nuc          | 0.142             | -1.838                     | 0.534             | 0.396                      | 0.003             | -1.773                |
| MRPL33    | mito         | 0.001             | -1.516                     | 0.418             | 0.262                      | 0.001             | -1.771                |
| KCNN3     | PM           | 0.297             | -1.476                     | 0.095             | 0.464                      | 0.009             | -1.728                |
| MRPL34    | mito         | 0.012             | -1.232                     | 0.013             | 0.521                      | 0.001             | -1.698                |
| CUL9      | cyto         | 0.031             | -2.430                     | 0.200             | 0.668                      | 0.007             | -1.675                |
| GDAP2     | lyso         | 0.080             | -1.519                     | 0.338             | 0.477                      | 0.007             | -1.635                |
| RIMBP2    | PM           | 0.705             | -0.817                     | 0.003             | 0.836                      | 0.006             | -1.551                |
| MS4A3     | PM           | 0.456             | -1.309                     | 0.441             | 0.496                      | 0.009             | -1.541                |
| ENPP3     | PM           | 0.014             | -1.139                     | 0.089             | 0.521                      | 0.003             | -1.527                |
| SLMO2     | mito         | 0.059             | -1.359                     | 0.287             | 0.148                      | 0.007             | -1.513                |
| ARL6IP1   | ER           | 0.218             | -0.601                     | 0.002             | 0.669                      | 0.006             | -1.493                |

|          |           |       |        |       |        |       |        |
|----------|-----------|-------|--------|-------|--------|-------|--------|
| NDUFS2   | mito      | 0.068 | -1.181 | 0.024 | 0.577  | 0.002 | -1.485 |
| CAPN3    | cyto      | 0.022 | -1.076 | 0.024 | 0.605  | 0.004 | -1.474 |
| ARSA     | lyso/ER   | 0.007 | -1.156 | 0.197 | 0.292  | 0.003 | -1.454 |
| MRPL16   | mito      | 0.005 | -1.000 | 0.008 | 0.552  | 0.001 | -1.446 |
| ZNF711   | nuc       | 0.009 | -1.308 | 0.949 | 0.216  | 0.008 | -1.443 |
| TOR3A    | ER        | 0.005 | -1.319 | 0.642 | 0.057  | 0.003 | -1.413 |
| AARS2    | mito      | 0.003 | -1.298 | 0.376 | 0.144  | 0.001 | -1.410 |
| ANAPC10  | cyto/nuc  | 0.229 | -0.551 | 0.706 | 0.501  | 0.006 | -1.408 |
| COA3     | mito      | 0.021 | -0.827 | 0.204 | 0.540  | 0.007 | -1.374 |
| MAGEA11  | cyto      | 0.005 | -2.550 | 0.055 | 1.000  | 0.004 | -1.342 |
| BCS1L    | mito      | 0.201 | -0.613 | 0.504 | 0.849  | 0.004 | -1.327 |
| EI24     | ER/golgi  | 0.504 | -0.567 | 0.002 | 0.765  | 0.005 | -1.322 |
| MRPL30   | mito      | 0.005 | -0.976 | 0.090 | 0.512  | 0.001 | -1.307 |
| CHMP2A   | endosome  | 0.255 | -0.076 | 0.483 | 1.185  | 0.009 | -1.274 |
| ZNF333   | nuc       | 0.067 | -0.822 | 0.042 | 0.635  | 0.004 | -1.249 |
| RNF146   | cyto      | 0.013 | -1.152 | 0.390 | 0.181  | 0.006 | -1.245 |
| ATG10    | lyso/cyto | 0.143 | -0.541 | 0.023 | 0.876  | 0.006 | -1.240 |
| POLG2    | mito      | 0.100 | -0.877 | 0.009 | 0.675  | 0.001 | -1.229 |
| SULT1C2  | cyto      | 0.019 | -0.804 | 0.136 | 0.696  | 0.001 | -1.217 |
| NDUFS5   | mito      | 0.020 | -1.036 | 0.048 | 0.458  | 0.001 | -1.214 |
| KCNK13   | PM        | 0.012 | -0.702 | 0.047 | 0.563  | 0.002 | -1.201 |
| CHAF1A   | nuc       | 0.099 | -1.101 | 0.170 | 0.731  | 0.003 | -1.195 |
| TECPR1   | lyso      | 0.060 | -0.795 | 0.454 | 0.507  | 0.009 | -1.187 |
| MRPL41   | mito      | 0.053 | -1.291 | 0.248 | 0.337  | 0.001 | -1.175 |
| TRMT10C  | mito      | 0.196 | -0.640 | 0.041 | 0.716  | 0.009 | -1.168 |
| WBSCR16  | mito      | 0.005 | -0.784 | 0.272 | 0.371  | 0.002 | -1.165 |
| ZNF414   | nuc       | 0.030 | -0.745 | 0.211 | 0.331  | 0.007 | -1.163 |
| GP9      | PM        | 0.835 | -0.388 | 0.011 | 1.073  | 0.003 | -1.142 |
| GRSF1    | mito      | 0.012 | -1.033 | 0.523 | 0.184  | 0.005 | -1.138 |
| ALYREF   | cyto/nuc  | 0.031 | -1.353 | 0.798 | 0.191  | 0.003 | -1.118 |
| COA4     | mito      | 0.082 | -1.005 | 0.184 | 0.334  | 0.006 | -1.100 |
| MRPL55   | mito      | 0.088 | -0.616 | 0.007 | 0.571  | 0.002 | -1.039 |
| CNTF     | extracell | 0.004 | -0.881 | 0.479 | 0.165  | 0.003 | -1.023 |
| ETV1     | nuc       | 0.027 | -1.217 | 0.784 | 0.210  | 0.002 | -1.018 |
| MRPL17   | mito      | 0.065 | -1.030 | 0.921 | 0.152  | 0.008 | -0.991 |
| WIPI1    | endosome  | 0.012 | -0.993 | 0.651 | 0.242  | 0.002 | -0.991 |
| PTCD1    | mito      | 0.010 | -0.835 | 0.412 | 0.184  | 0.003 | -0.980 |
| C16orf45 | nuc       | 0.017 | -0.900 | 0.611 | 0.197  | 0.004 | -0.979 |
| PRUNE2   | cyto      | 0.404 | -0.392 | 0.079 | 0.931  | 0.009 | -0.957 |
| MRPL22   | mito      | 0.149 | -0.378 | 0.024 | 0.641  | 0.008 | -0.950 |
| ATP5J2   | mito      | 0.028 | -0.771 | 0.276 | 0.184  | 0.007 | -0.949 |
| SLC26A4  | PM        | 0.004 | -0.823 | 0.881 | 0.009  | 0.008 | -0.949 |
| DDRGK1   | ER        | 0.014 | -0.794 | 0.578 | 0.166  | 0.006 | -0.944 |
| POLE2    | nuc       | 0.136 | -0.715 | 0.117 | 0.388  | 0.009 | -0.929 |
| ZDHHC2   | ER/golgi  | 0.716 | -0.239 | 0.003 | 0.777  | 0.005 | -0.924 |
| EPG5     | nuc       | 0.188 | -0.368 | 0.066 | 0.708  | 0.005 | -0.914 |
| TMEM74   | lyso      | 0.025 | -0.566 | 0.535 | 0.182  | 0.005 | -0.905 |
| WDFY3    | cyto/nuc  | 0.118 | -0.650 | 0.430 | 0.456  | 0.008 | -0.902 |
| KLK6     | mito/nuc  | 0.119 | -1.015 | 0.922 | 0.318  | 0.006 | -0.868 |
| RNF183   | ER        | 0.031 | -0.635 | 0.129 | 0.445  | 0.004 | -0.866 |
| TRAPPC12 | cyto/nuc  | 0.116 | -0.533 | 0.044 | 0.449  | 0.008 | -0.838 |
| LIPT2    | mito      | 0.052 | -0.848 | 0.473 | 0.106  | 0.007 | -0.829 |
| ASB16    | cyto      | 0.320 | -0.103 | 0.103 | 0.739  | 0.009 | -0.821 |
| FZD6     | PM        | 0.196 | -0.559 | 0.202 | 0.469  | 0.006 | -0.808 |
| RAB5C    | lyso      | 0.073 | -0.573 | 0.100 | 0.263  | 0.009 | -0.796 |
| CDK5RAP3 | cyto      | 0.043 | -0.764 | 0.308 | 0.208  | 0.004 | -0.785 |
| DCLK2    | cyto      | 0.361 | -0.278 | 0.175 | 0.580  | 0.010 | -0.782 |
| PIGF     | ER        | 0.181 | -0.254 | 0.133 | 0.461  | 0.008 | -0.758 |
| KIAA0391 | mito      | 0.030 | -0.609 | 0.362 | 0.210  | 0.009 | -0.700 |
| CEACAM5  | PM        | 0.084 | -0.827 | 0.358 | 0.015  | 0.007 | -0.679 |
| LRR1     | nuc       | 0.282 | -0.199 | 0.129 | 0.523  | 0.009 | -0.594 |
| LILRB4   | PM        | 0.060 | 0.810  | 0.140 | -0.358 | 0.010 | 0.616  |
| SCUBE1   | PM        | 0.039 | 0.637  | 0.693 | -0.112 | 0.010 | 0.620  |
| TMC4     | PM        | 0.168 | 0.506  | 0.184 | -0.485 | 0.010 | 0.649  |
| LOH12CR1 | lyso      | 0.014 | 0.813  | 0.893 | -0.014 | 0.009 | 0.726  |
| PNISR    | cyto/nuc  | 0.007 | 0.645  | 0.536 | -0.255 | 0.002 | 0.748  |
| C1orf194 | nuc       | 0.024 | 0.884  | 0.846 | -0.170 | 0.009 | 0.751  |
| FUCA2    | ER/lyso   | 0.100 | 0.485  | 0.064 | -0.425 | 0.005 | 0.754  |

|          |           |       |       |       |        |       |       |
|----------|-----------|-------|-------|-------|--------|-------|-------|
| WDR64    | cyto      | 0.030 | 0.822 | 0.812 | -0.119 | 0.009 | 0.767 |
| UQCRC2   | mito      | 0.016 | 0.779 | 0.927 | -0.008 | 0.010 | 0.770 |
| DOCK2    | cyto      | 0.552 | 0.176 | 0.029 | -0.787 | 0.005 | 0.771 |
| CSTB     | cyto      | 0.420 | 0.265 | 0.073 | -0.776 | 0.008 | 0.795 |
| C10orf32 | lyso      | 0.462 | 0.377 | 0.045 | -0.705 | 0.007 | 0.818 |
| ITIH3    | extracell | 0.146 | 0.619 | 0.056 | -0.599 | 0.003 | 0.824 |
| FOXK2    | nuc       | 0.008 | 0.658 | 0.710 | -0.180 | 0.007 | 0.832 |
| OR5A2    | PM        | 0.025 | 0.470 | 0.047 | -0.372 | 0.002 | 0.835 |
| LYVE1    | extracell | 0.226 | 0.399 | 0.008 | -0.520 | 0.005 | 0.841 |
| ZPBP2    | nuc       | 0.320 | 0.092 | 0.010 | -0.669 | 0.006 | 0.842 |
| DMXL2    | extracell | 0.794 | 0.028 | 0.010 | -0.904 | 0.008 | 0.848 |
| SHOC2    | cyto/nuc  | 0.141 | 0.498 | 0.037 | -0.687 | 0.001 | 0.856 |
| COG7     | golgi/nuc | 0.699 | 0.046 | 0.056 | -1.041 | 0.006 | 0.858 |
| THOC6    | nuc       | 0.974 | 0.188 | 0.012 | -0.898 | 0.009 | 0.867 |
| CRYGS    | cyto/nuc  | 0.054 | 0.444 | 0.158 | -0.646 | 0.004 | 0.871 |
| TMTC4    | PM        | 0.015 | 0.625 | 0.335 | -0.477 | 0.003 | 0.871 |
| TRABD2B  | extracell | 0.051 | 0.797 | 0.864 | -0.449 | 0.006 | 0.873 |
| PRSS33   | extracell | 0.015 | 0.780 | 0.714 | -0.124 | 0.010 | 0.876 |
| TC2N     | nuc       | 0.074 | 0.491 | 0.128 | -0.536 | 0.007 | 0.879 |
| SERPINA3 | lyso      | 0.031 | 0.677 | 0.277 | -0.443 | 0.002 | 0.889 |
| S100A6   | cyto      | 0.062 | 0.664 | 0.215 | -0.392 | 0.010 | 0.903 |
| OR7E24   | PM        | 0.497 | 0.239 | 0.128 | -0.881 | 0.008 | 0.919 |
| CBLB     | cyto/nuc  | 0.590 | 0.182 | 0.007 | -1.475 | 0.003 | 0.924 |
| IRS1     | cyto      | 0.460 | 0.229 | 0.163 | -1.056 | 0.007 | 0.926 |
| C21orf91 | MTs       | 0.159 | 0.418 | 0.184 | -0.656 | 0.007 | 0.928 |
| TMEM170A | ER        | 0.110 | 0.665 | 0.180 | -0.403 | 0.009 | 0.941 |
| NLRP1    | cyto      | 0.118 | 0.411 | 0.021 | -0.621 | 0.004 | 0.945 |
| UBE2O    | nuc       | 0.017 | 0.818 | 0.380 | -0.264 | 0.006 | 0.979 |
| CUL3     | cyto      | 0.013 | 1.047 | 0.888 | -0.058 | 0.004 | 0.993 |
| KRTAP2-3 | cyto      | 0.056 | 0.740 | 0.244 | -0.278 | 0.009 | 0.998 |
| C17orf85 | nuc       | 0.337 | 0.416 | 0.062 | -0.856 | 0.009 | 1.018 |
| NOL11    | nuc       | 0.361 | 0.448 | 0.062 | -0.921 | 0.001 | 1.024 |
| ITPK1    | cyto      | 0.599 | 0.022 | 0.008 | -0.948 | 0.005 | 1.026 |
| SEMA4G   | PM        | 0.072 | 0.648 | 0.033 | -0.483 | 0.007 | 1.052 |
| LACTBL1  | cyto      | 0.105 | 0.651 | 0.263 | -0.500 | 0.009 | 1.057 |
| PTK2     | cyto      | 0.010 | 0.940 | 0.436 | -0.188 | 0.005 | 1.068 |
| NMD3     | nuc       | 0.025 | 1.211 | 0.841 | -0.051 | 0.005 | 1.069 |
| ASCC3    | cyto/nuc  | 0.038 | 0.815 | 0.121 | -0.625 | 0.002 | 1.073 |
| MED21    | nuc       | 0.611 | 0.160 | 0.002 | -1.058 | 0.001 | 1.074 |
| CDR2     | nuc       | 0.499 | 0.451 | 0.007 | -0.620 | 0.007 | 1.114 |
| E2F8     | cyto      | 0.476 | 0.256 | 0.005 | -0.866 | 0.004 | 1.117 |
| GPR133   | PM        | 0.039 | 0.651 | 0.032 | -0.743 | 0.001 | 1.121 |
| SCG5     | extracell | 0.230 | 0.229 | 0.003 | -0.722 | 0.003 | 1.122 |
| UBE2J1   | ER        | 0.573 | 0.139 | 0.018 | -1.086 | 0.002 | 1.144 |
| TWIST2   | nuc       | 0.024 | 0.776 | 0.248 | -0.509 | 0.006 | 1.187 |
| PFDN5    | nuc       | 0.002 | 0.950 | 0.791 | -0.279 | 0.006 | 1.192 |
| LY96     | endosome  | 0.073 | 0.750 | 0.073 | -0.822 | 0.005 | 1.214 |
| SCD      | ER        | 0.351 | 0.334 | 0.091 | -1.164 | 0.008 | 1.228 |
| BIK      | mito      | 0.052 | 1.192 | 0.383 | -0.248 | 0.008 | 1.285 |
| C17orf82 | nuc       | 0.231 | 0.424 | 0.117 | -1.260 | 0.004 | 1.362 |
| CALCOCO2 | cyto/nuc  | 0.175 | 0.707 | 0.030 | -1.057 | 0.009 | 1.398 |
| GCA      | cyto      | 0.216 | 0.484 | 0.017 | -1.217 | 0.001 | 1.410 |
| OR56A1   | PM        | 0.012 | 0.685 | 0.305 | -0.734 | 0.007 | 1.476 |
| CCDC130  | nuc       | 0.012 | 0.935 | 0.188 | -0.734 | 0.006 | 1.494 |
| CHERP    | ER        | 0.062 | 0.909 | 0.037 | -1.199 | 0.000 | 1.497 |
| INTS7    | cyto/nuc  | 0.211 | 0.391 | 0.022 | -1.201 | 0.008 | 1.513 |
| TPTE2    | ER        | 0.195 | 0.546 | 0.151 | -0.701 | 0.003 | 1.545 |
| ABCB9    | lyso      | 0.276 | 0.222 | 0.194 | -0.287 | 0.007 | 1.633 |
| NUCKS1   | nuc       | 0.250 | 0.442 | 0.143 | -1.325 | 0.008 | 1.709 |
| JUNB     | nuc       | 0.004 | 0.764 | 0.055 | -1.155 | 0.001 | 1.783 |
| FAP      | PM        | 0.013 | 1.166 | 0.812 | -1.038 | 0.001 | 1.855 |
| MMS22L   | nuc       | 0.180 | 0.307 | 0.015 | -1.753 | 0.002 | 1.923 |
| RPL7A    | cyto      | 0.428 | 0.927 | 0.004 | -2.293 | 0.004 | 2.152 |
| CCNC     | nuc       | 0.006 | 1.945 | 0.576 | -0.172 | 0.002 | 2.172 |
| RAF1     | mito      | 0.011 | 1.290 | 0.059 | -1.414 | 0.002 | 3.005 |
| SNW1     | nuc       | 0.017 | 3.081 | 0.209 | -0.269 | 0.003 | 3.204 |
| RSRC2    | nuc       | 0.017 | 0.661 | 0.019 | -2.794 | 0.002 | 3.355 |
| RPS5     | cyto      | 0.271 | 1.632 | 0.034 | -1.594 | 0.010 | 3.619 |

**Table S3** – Immunoprecipitation-mass spectrometry analysis of DDRGK1 interactors.  
Related to Fig 6.

| Alternate ID | Molecular Weight | DDKO-1 | DDKO-2 | DDKO-3 | DD-HA-1 | DD-HA-2 | DD-HA-3 | DDKO/DD-HA* |
|--------------|------------------|--------|--------|--------|---------|---------|---------|-------------|
| UFL1         | 90 kDa           | 0      | 0      | 0      | 61      | 53      | 50      | 0           |
| DDRGK1       | 36 kDa           | 0      | 0      | 0      | 50      | 42      | 41      | 0           |
| MYBBP1A      | 149 kDa          | 2      | 0      | 0      | 17      | 15      | 17      | 0.666666667 |
| IRS4         | 134 kDa          | 0      | 0      | 0      | 6       | 5       | 3       | 0           |
| PABPC1       | 71 kDa           | 0      | 0      | 0      | 8       | 3       | 2       | 0           |
| RPL7A        | 30 kDa           | 2      | 0      | 2      | 11      | 13      | 10      | 1.333333333 |
| GNL2         | 84 kDa           | 0      | 0      | 0      | 6       | 4       | 2       | 0           |
| LTV1         | 55 kDa           | 0      | 0      | 0      | 6       | 2       | 4       | 0           |
| NAT10        | 116 kDa          | 0      | 0      | 0      | 5       | 5       | 2       | 0           |
| EMD          | 29 kDa           | 2      | 0      | 0      | 6       | 8       | 6       | 0.666666667 |
| DHX9         | 141 kDa          | 0      | 0      | 0      | 8       | 2       | 0       | 0           |
| CHMP4B       | 25 kDa           | 0      | 0      | 0      | 3       | 4       | 3       | 0           |
| RRP12        | 144 kDa          | 0      | 0      | 0      | 3       | 3       | 4       | 0           |
| RPLP0        | 34 kDa           | 0      | 0      | 2      | 7       | 5       | 6       | 0.666666667 |
| BANF1        | 10 kDa           | 0      | 0      | 0      | 3       | 3       | 3       | 0           |
| RCN2         | 37 kDa           | 0      | 0      | 0      | 6       | 3       | 0       | 0           |
| HSPA1A       | 70 kDa           | 0      | 2      | 0      | 7       | 5       | 4       | 0.666666667 |
| NOP56        | 66 kDa           | 0      | 0      | 2      | 7       | 4       | 5       | 0.666666667 |
| LYAR         | 44 kDa           | 0      | 0      | 0      | 3       | 2       | 3       | 0           |
| RPL10A       | 25 kDa           | 2      | 2      | 2      | 9       | 9       | 9       | 2           |
| RFC1         | 128 kDa          | 0      | 0      | 0      | 3       | 2       | 2       | 0           |
| RRP1         | 53 kDa           | 0      | 0      | 0      | 3       | 2       | 2       | 0           |
| FCF1         | 23 kDa           | 0      | 0      | 0      | 2       | 2       | 3       | 0           |
| RPL15        | 24 kDa           | 2      | 0      | 2      | 7       | 7       | 6       | 1.333333333 |
| TEX10        | 106 kDa          | 0      | 2      | 0      | 5       | 3       | 5       | 0.666666667 |
| NOP58        | 60 kDa           | 0      | 0      | 2      | 5       | 4       | 3       | 0.666666667 |
| RPL22L1      | 15 kDa           | 0      | 0      | 0      | 4       | 2       | 0       | 0           |
| RPL30        | 13 kDa           | 0      | 0      | 0      | 2       | 2       | 2       | 0           |
| AIMP1        | 34 kDa           | 0      | 0      | 0      | 2       | 2       | 2       | 0           |
| CDC20        | 55 kDa           | 0      | 0      | 0      | 2       | 2       | 2       | 0           |
| TUBG1        | 51 kDa           | 0      | 0      | 0      | 2       | 2       | 2       | 0           |
| HNRNPF       | 46 kDa           | 3      | 0      | 2      | 7       | 7       | 6       | 1.666666667 |
| KPNB1        | 97 kDa           | 2      | 0      | 2      | 7       | 2       | 7       | 1.333333333 |
| HEATR3       | 75 kDa           | 0      | 0      | 0      | 3       | 0       | 2       | 0           |
| KIFC1        | 74 kDa           | 0      | 0      | 0      | 3       | 0       | 2       | 0           |
| BRX1         | 41 kDa           | 0      | 0      | 0      | 5       | 0       | 0       | 0           |
| USP10        | 87 kDa           | 0      | 0      | 0      | 2       | 0       | 3       | 0           |
| MYH9         | 227 kDa          | 3      | 0      | 0      | 4       | 0       | 9       | 1           |
| PNO1         | 28 kDa           | 0      | 0      | 2      | 3       | 2       | 5       | 0.666666667 |
| HNRNPM       | 78 kDa           | 7      | 5      | 8      | 25      | 18      | 13      | 6.666666667 |
| RPL8         | 28 kDa           | 4      | 0      | 2      | 8       | 6       | 6       | 2           |
| NPM1         | 33 kDa           | 0      | 2      | 0      | 9       | 0       | 0       | 0.666666667 |
| SREK1IP1     | 18 kDa           | 0      | 0      | 2      | 3       | 2       | 4       | 0.666666667 |

**Table S4** – Immunoprecipitation-mass spectrometry analysis of DDRGK1-dependent UFMylation substrates. Related to Fig 6.

| Alternate ID | Molecular Weight | HEK293T Neg Ctrl | UFSP2+DDRGK1 KO-Biorep1 | UFSP2+DDRGK1 KO-Biorep2 | UFSP2+DDRGK1 KO-Biorep3 | UFSP2 KO-Biorep1 | UFSP2 KO-Biorep2 | UFSP2 KO-Biorep3 | UFSP2 KO/UFSP2+DDRGK1 KO* |
|--------------|------------------|------------------|-------------------------|-------------------------|-------------------------|------------------|------------------|------------------|---------------------------|
| ACLY         | 121 kDa          | 0                | 2                       | 0                       | 0                       | 7                | 9                | 10               | 5.8                       |
| EPRS         | 171 kDa          | 0                | 0                       | 0                       | 0                       | 6                | 2                | 5                | 5.333333333               |
| ASNS         | 64 kDa           | 0                | 0                       | 0                       | 0                       | 5                | 4                | 2                | 4.666666667               |
| RACK1        | 35 kDa           | 0                | 0                       | 0                       | 2                       | 4                | 3                | 4                | 2.8                       |
| RPN1         | 69 kDa           | 0                | 3                       | 4                       | 3                       | 8                | 10               | 10               | 2.384615385               |
| CLTC         | 192 kDa          | 4                | 5                       | 8                       | 7                       | 17               | 17               | 16               | 2.304347826               |
| GOT2         | 48 kDa           | 0                | 2                       | 2                       | 3                       | 4                | 5                | 4                | 1.6                       |
| RPL26        | 17 kDa           | 2                | 9                       | 9                       | 9                       | 14               | 14               | 13               | 1.466666667               |
| GANAB        | 107 kDa          | 2                | 7                       | 10                      | 7                       | 13               | 13               | 13               | 1.555555556               |
| HNRNPU       | 91 kDa           | 4                | 6                       | 7                       | 5                       | 11               | 10               | 13               | 1.761904762               |
| FASN         | 273 kDa          | 11               | 18                      | 16                      | 14                      | 24               | 21               | 25               | 1.431372549               |
| UFM1         | 9 kDa            | 0                | 14                      | 12                      | 12                      | 13               | 14               | 13               | 1.048780488               |
| RPL7A        | 30 kDa           | 4                | 6                       | 7                       | 8                       | 7                | 8                | 10               | 1.166666667               |
| RPL10A       | 25 kDa           | 0                | 2                       | 3                       | 2                       | 3                | 2                | 3                | 1.1                       |
| UFC1         | 19 kDa           | 0                | 4                       | 5                       | 5                       | 4                | 3                | 4                | 0.823529412               |
| STRAP        | 38 kDa           | 0                | 3                       | 2                       | 2                       | 2                | 2                | 2                | 0.9                       |
| UBA5         | 45 kDa           | 0                | 9                       | 8                       | 10                      | 8                | 9                | 8                | 0.933333333               |

\* +1 inflation was performed for the average peptide count of both UFSP2+DDRGK1 KO and UFSP2 KO conditions before ratio count.

**Table S5** – CRISPR cutting and CRISPRi sgRNA sequences used in this study. Related to STAR methods in the generation of cell lines with gene knockout or knockdown.

| <b>Construct</b>                           | <b>Protospacer</b>      | <b>Source</b>        |
|--------------------------------------------|-------------------------|----------------------|
| AMPK $\alpha$ 1-sgRNA1(RNP cutting guide)  | GGCTGTCGCCATCTTTCTCC    | This study           |
| AMPK $\alpha$ 1-sgRNA2 (RNP cutting guide) | GAAGATCGGCCACTACATTC    | This study           |
| AMPK $\alpha$ 2-sgRNA1 (RNP cutting guide) | TCAGCCATCTTCGGCGCGCG    | This study           |
| AMPK $\alpha$ 2-sgRNA2 (RNP cutting guide) | GAAGATCGGACACTACGTGC    | This study           |
| pX458-DDRGK1*sgRNA1                        | ATGAGATCCCGGCCTCAGGG    | This study           |
| pX458- UFL1-sgRNA1                         | TAGGAGATGCCGCTGCACCA    | This study           |
| pX458- UFL1-sgRNA2                         | CTGACTCGCAGTAGACGCGG    | This study           |
| pX458-UFSP2-sgRNA                          | GCCTAATT TGGGCTCCACAA   | This study           |
| pX458-pLG1-puro NT sgRNA                   | AATAAGAGGAGGCCTTGATT    | Walczak et al. 2019  |
| pLG1-puro NT sgRNA                         | GCGCCAAACGTGCCCTGACGG   | Addgene #109002      |
| pLG1-puro ULK1 sgRNA                       | GGCGGCGGCACAGAGACCGT    | Addgene #109004      |
| pLG1-puro ATG10 sgRNA                      | GAGGCCGCGGACCTGACTGA    | Horlback et al. 2016 |
| pLG1-puro VPS16 sgRNA                      | GAAAGGCAGAGTCCCCGAGT    | Horlback et al. 2016 |
| pLG1-puro EI24 sgRNA                       | GACGGGGCCGCTGGGAAGTC    | Horlback et al. 2016 |
| pLG1-puro NDUFB4 sgRNA                     | GGGCTCCCAGGCGGGAATA     | Horlback et al. 2016 |
| pLG1-puro NDUFB2 sgRNA                     | GGGGGAAGCGAAGTAGGCAG    | Horlback et al. 2016 |
| pLG1-puro ATP5O sgRNA                      | GGTCCCCGGGATGCCTACG     | Horlback et al. 2016 |
| pLG1-puro DDRGK1 sgRNA-1                   | GCCGCTACCAAGTACCACAC    | Horlback et al. 2016 |
| pLG1-puro DDRGK1 sgRNA-2                   | GGCGGCGCGACGGTCCACAA    | Horlback et al. 2016 |
| pLG1-puro DDRGK1 sgRNA-3                   | GTGCACTGAGGCCCTCGTCA    | Horlback et al. 2016 |
| pLG1-hygro DDRGK1 sgRNA-3                  | GTGCACTGAGGCCCTCGTCA    | Horlback et al. 2016 |
| pLG1-puro UFL1 sgRNA-1                     | GGCCTGACTCGCAGTAGACG    | Horlback et al. 2016 |
| pLG1-puro UFL1 sgRNA-2                     | GCGCCTGGGAAGAGATTAGG    | Horlback et al. 2016 |
| pLG1-puro UFM1 sgRNA-1                     | GAAGAGATGAAGACTGCGTG    | Horlback et al. 2016 |
| pLG1-puro UFM1 sgRNA-2                     | GGGAAGTCGTGCTACCCCCG    | Horlback et al. 2016 |
| pLG1-puro UBA5 sgRNA-1                     | GCGCTGGGTGCACGTCCCCA    | Horlback et al. 2016 |
| pLG1-puro IRE1a sgRNA-1                    | GGGCGGTGACCGAGCCTCAG    | Horlback et al. 2016 |
| pLG1-puro IRE1a sgRNA-2                    | GAGCGGACGCAGAAGTACTGACT | Horlback et al. 2016 |
| pLG1-puro FAM134B sgRNA-1                  | GGGACTGGAGAGAGAATGCG    | Horlback et al. 2016 |
| pLG1-puro FAM134B sgRNA-2                  | GAGGTGAAGTCATCCAATGA    | Horlback et al. 2016 |
| pLG1-puro FAM134B sgRNA-3                  | GTCCTAGCTTCATTCAAGGG    | Horlback et al. 2016 |
| pLG1-puro FAM134B sgRNA-4                  | GCTCCCAGTACTGTGACAGG    | Horlback et al. 2016 |
| pLG1-puro FAM134B sgRNA-5                  | GGCACGAACTCACTCAAGAG    | Horlback et al. 2016 |
| pLG1-puro CDK5RAP3 sgRNA-1                 | GGAGTCGAGATGCTGACCAC    | Horlback et al. 2016 |
| pLG1-puro CDK5RAP3 sgRNA-2                 | GGGAGGGAGACCGGAGACAC    | Horlback et al. 2016 |
| pLG1-puro Sox9 sgRNA-3                     | GGGAGTTGGAGAGCCGAAAG    | Horlback et al. 2016 |
| pLG1-puro Sox9 sgRNA-4                     | GGTCCGAGCCGGAGCCCGAC    | Horlback et al. 2016 |
| pLG1-puro ASC1 sgRNA-1                     | GTAGTCCGGTGCAGGACGTG    | Horlback et al. 2016 |
| pLG1-puro ASC1 sgRNA-2                     | GTGGTTCCGGCTGGGGAAGA    | Horlback et al. 2016 |

**Table S6** - qRT-PCR primers used in this study. Related STAR methods for the quantitative measurement of cDNA.

| <b>Target</b> | <b>Primer 1</b>         | <b>Primer 2</b>         |
|---------------|-------------------------|-------------------------|
| EI24          | AGTGTTGTGCTTGAATGGTGG   | GCCACGACCAACATCTCCATG   |
| VPS16         | ACTCGGGGACTCTGCCTTTTAC  | GGCAATCCCTGAGTTCTCCTT   |
| ULK1          | GTCGCCGTCAAGTGCATTAACA  | CGTACAGGGCCACGATGTTTTC  |
| ATG10         | GTGATAGTTGGGAATGGAGACC  | GGTAGATGCTCCTAGATGTGAC  |
| sXBP1         | TGCTGAGTCCGCAGCAGGTG    | GCTGGCAGGCTCTGGGGAAG    |
| ACTB          | GGGTCAGAAGGATTCCTATG    | GGTCTCAAACATGATCTGGG    |
| IRE1A         | ACTTTGTCATCGGCCTTTGCAG  | AGTGAGGCCGCATAGTCAAAGT  |
| PERK          | TGGTGTCCATCCAGCCTTAGCAA | CATGCTTTCACGGTCTTGGTCC  |
| DDRGK1        | AAGGAGGAGGAGGAGAGGAAGG  | CTCTGTCAGGAAGCTCTGGGAC  |
| UFL1          | TCGGTTGGCAGAAGAGGTCAAT  | AAGTCGCTGAGTTAGTGCCTGT  |
| FAM134B       | CCAGATGAAAGACCCAGGCTCA  | TGCACACACTACAGACCAGGAG  |
| CDK5RAP3      | TGCTGGAGGATCTGATTGGCAA  | ACTCGGTCCACATACCTTGGTG  |
| SOX9          | GGCAAGCTCTGGAGACTTCTGA  | GGCTGGTACTTGTAAATCCGGGT |
| ASC1          | CCCACAGAGGACGACTTTGGAT  | CCCAGAAGACAACCTGACGGAT  |
| BiP           | TCTGTGCAGCAGGACATCAAGT  | GTCTTTGTTTGCCACCTCCAA   |
| CANX          | CACTGCTCCTCCTCATCTCCC   | TCCACCCTGACAGAGTTCCTCT  |
| CLIMP63       | CAGGACTTCTCCCGGCAGAG    | TCCAAATGTGGCTTGCAAAGACT |
| REEP5         | GTTCTGACGAGAAGAACTGC    | AGAGGCTCCATAACCGAACACC  |
